# Supplementary material for: Synergetic improvement of mechanical properties and surface activities in γ-irradiated carbon fibers revealed by radial positioning spectroscopy and mechanical model
Source: Royal Society of Chemistry journal article supplement (doi:10.1039/c7ay02852k), 2017-12-27
Supplement: c7ay02852k1.pdf [file c7ay02852k1.pdf]

## Supplementary Information

### Synergetic improvement of mechanical properties and surface activities in $\gamma$ -irradiated carbon fibers revealed by radial positioning spectroscopy and mechanical model

Mingjing Shan<sup>#</sup>, Haibo Wang <sup>#</sup>, Zhiwei Xu<sup>\*</sup>, Nan Li, Cheng Chen, Jie Shi, Liangsen Liu, Liyun Kuang, Meijun Ma, Ce Zhang

State Key Laboratory of Separation Membranes and Membrane Processes, School of Textiles, Tianjin Polytechnic University, Tianjin 300387, China

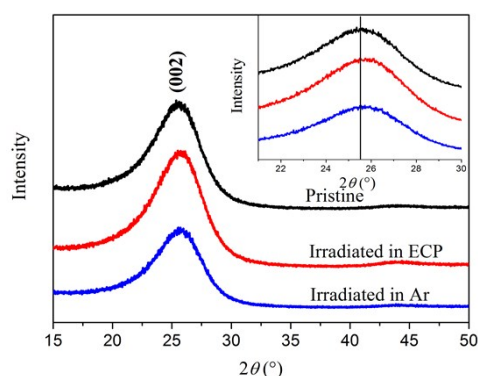

**Fig. S1.** X-ray diffraction profiles of pristine and irradiated CFs (The inset show the magnified 002 peak in the range of 21-30°).

**Table S1** Structural parameters of CFs detected by X-ray diffraction.

| Sample            | $2\theta$ (°) | $d_{002}$ (nm) |
|-------------------|---------------|----------------|
| As-received       | 25.34         | 0.3474         |
| Irradiated in Ar  | 25.52         | 0.3450         |
| Irradiated in ECP | 25.51         | 0.3453         |

<sup>#</sup> These authors contributed equally to this work.

Corresponding author. Tel.: Fax: +86 022 83955231. E-mail address: xuzhiwei@tjpu.edu.cn (Zhiwei Xu)

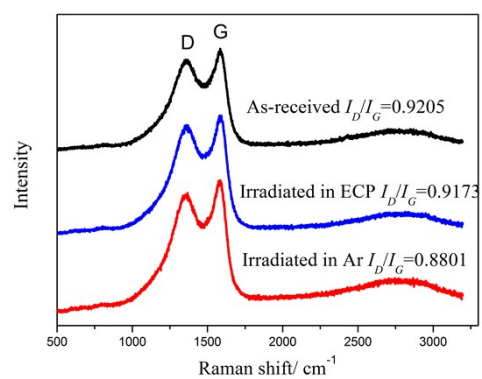

**Fig. S2.** Raman spectra for surface scan of pristine and irradiated CFs.

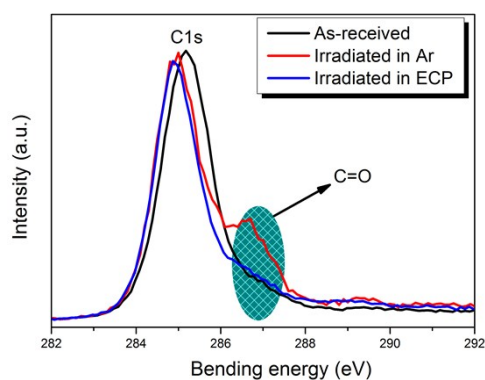

**Fig. S3.**  $\text{C}1\text{s}$  peak spectra of pristine and irradiated CFs determined by XPS.

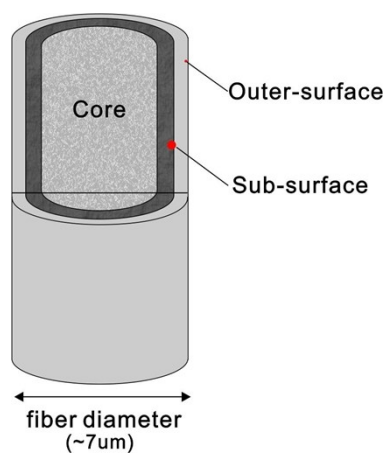

**Fig. S4.** Schematic illustration of 3-layer structures of CFs consisting of core, sub-surface and outer-surface parts.

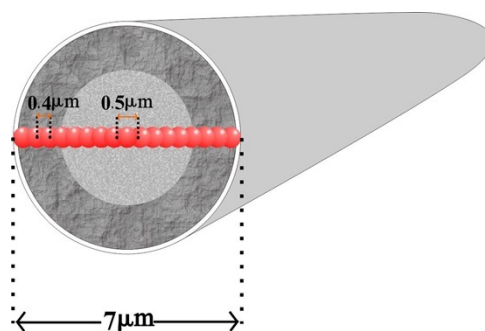

**Fig. S5.** Schematic illustration of Raman spectra from fiber cross-section.

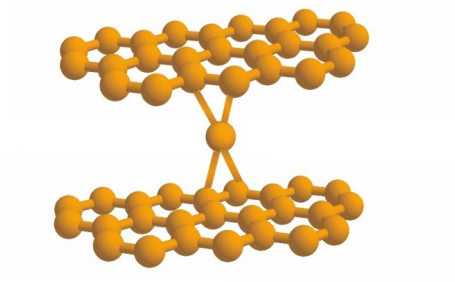

**Fig. S6.** Schematic illustration of cross-linking between graphene layers [1, 2].

## References

- [1] Xiao H, Lu Y, Wang M, Qin X, Zhao W, Luan J. Effect of gamma-irradiation on the mechanical properties of polyacrylonitrile-based carbon fiber. *Carbon* 2013;52:427-39.
- [2] Telling RH, Ewels CP, Ahlam A, Heggie MI. Wigner defects bridge the graphite gap. *Nat. Mater.* 2003;2(5):333-7.
